# Supplementary material
Source: publisher figshare collection journal article supplement (https://gsajournals.figshare.com/ndownloader/files/26754104)
Supplement: Supplementary file 1 [file 26754104]

## Sheet: Data
mouseid	group	groupdesc	groupn	agemons	weightg	invn_weightg	abdomenfat	invn_abdomenfat	abdomensubfat	invn_abdomensubfat	abdomenvisfat	invn_abdomenvisfat	thoraxfat	invn_thoraxfat	thoraxsubfat	invn_thoraxsubfat	thoraxvisfat	invn_thoraxvisfat	neckfat	invn_neckfat	necksubfat	invn_necksubfat	neckvisfat	invn_neckvisfat	tonguefat	invn_tonguefat	pericardialfat	invn_pericardialfat	pc1	invn_pc1	pc2	invn_pc2
MRI_129#12	129	129S1/Sv1mJ	1	7.12936	30	0.291535	4882.65	0.403916	2614.75	0.457852	2267.9	0.223008	861.3	0.386631	620.137	0.862614	241.162	-0.134251	468.519	0.283623	402.669	0.862614	65.85	-0.862614	1.20042	-0.263127	6.1125	-0.607244	-0.185494	0.13971	-1.19793	-1.47055
MRI_129#8	129	129S1/Sv1mJ	1	7.06366	25	-0.327725	5331.95	0.513155	2784.27	0.59923	2547.67	0.403916	801.269	0.158851	517.45	0.493925	283.819	0.109733	523.181	0.549701	405.569	0.898476	117.612	-0.0608781	1.13804	-0.387869	16.5187	0.439645	0.214267	0.403108	-0.270278	-0.165327
MRI_129#1	129	129S1/Sv1mJ	1	6.83368	30	0.291535							849.5	0.309053	566.487	0.666871	283.012	0.0608781	526.306	0.578233	413.25	0.935531	113.056	-0.158851	1.50645	0.118514	6.925	-0.466613
MRI_129#9	129	129S1/Sv1mJ	1	7.12936	36	1.17866	8529.45	1.09274	4463.27	1.13852	4066.17	0.928899	1837.86	1.29833	1209.06	1.65914	628.806	1.09882	841.75	1.19264	672.1	1.29833	169.65	0.412993	1.698	0.312426	28.0625	1.14447	3.26768	1.22064	-0.508263	-0.63527
MRI_129#3	129	129S1/Sv1mJ	1	6.96509	31	0.569809	6037.62	0.689997	3230.17	0.855712	2807.45	0.541395	959.062	0.636774	674.981	0.973918	284.081	0.134251	429.162	0.208355	367.806	0.666871	61.3562	-1.0138	1.05524	-0.573897	7.55625	-0.258376	0.106479	0.295415	-1.33459	-1.74602
MRI_129#7	129	129S1/Sv1mJ	1	7.06366	28	0.0345017	4157.9	0.147987	2245.7	0.299307	1912.2	0.0737913	752.994	0.0365124	505.644	0.412993	247.35	-0.109733	399.925	0.0121684	308.719	0.258376	91.2062	-0.549701	0.9567	-0.814961	11.2812	0.0365124	-0.526797	-0.063341	-0.488037	-0.604585
MRI_129#11	129	129S1/Sv1mJ	1	7.12936	25	-0.327725	4688.88	0.32511	2383.05	0.377392	2305.82	0.248275	684.344	-0.0121684	482.837	0.283623	201.506	-0.334683	397.119	-0.0365124	328.987	0.439645	68.1312	-0.82783	1.00235	-0.719719	5.49375	-0.761092	-0.655802	-0.114185	-1.00588	-1.12021
MRI_129#5	129	129S1/Sv1mJ	1	7.06366	35	1.11219	7857.85	0.967422	4372.47	1.09274	3485.37	0.855712	1339.24	1.19264	776.356	1.19264	562.881	0.935531	934.856	1.24375	659.594	1.19264	275.262	1.42092	2.02344	0.573897	27.325	1.05536	2.86861	1.16895	0.573018	0.698526
MRI_129#10	129	129S1/Sv1mJ	1	7.12936	27	-0.13842	3576.42	-0.0245773	1963.72	0.098458	1612.7	-0.223008	784.362	0.134251	500.669	0.360536	283.694	0.0852799	442.494	0.233293	340.619	0.493925	101.875	-0.360536	1.10045	-0.439392	11.5125	0.0852799	-0.483375	-0.0379883	-0.345393	-0.295415
MRI_129#4	129	129S1/Sv1mJ	1	6.96509	35	1.11219	9839.57	1.18683	4776.12	1.18683	5063.45	1.13852	1603.61	1.24375	866.912	1.24375	736.694	1.35708	1015.99	1.29833	786.494	1.35708	229.5	0.82783	2.83721	0.992908	26.0562	0.898476	3.85339	1.27582	-0.224799	-0.063341
MRI_129#6	129	129S1/Sv1mJ	1	7.06366	30	0.291535	4690.57	0.351131	2137.12	0.223008	2553.45	0.430727	1018.61	0.728971	624.294	0.898476	394.319	0.52161	508.119	0.493925	374.631	0.697585	133.487	0.0365124	1.10034	-0.465589	9.5625	-0.0852799	0.129333	0.321971	-0.455026	-0.57446
MRI_129#2	129	129S1/Sv1mJ	1	6.96509	27	-0.13842	4566.4	0.273702	2770.02	0.570074	1796.37	-0.0491694	910.106	0.52161	567.056	0.697585	343.05	0.334683	480.819	0.360536	375.381	0.728971	105.437	-0.309053	1.11406	-0.413493	10.3312	-0.0608781	-0.037419	0.191052	-0.632325	-0.731217
MRI_C57#13	C57	C57BL/6J	2	6.45996	30	0.291535																			2.68208	0.918245
MRI_C57#25	C57	C57BL/6J	2	7.18275	27	-0.13842	2653.64	-0.351131	1208.67	-0.377392	1444.97	-0.299307	622.685	-0.158851	309.639	-0.233293	313.047	0.208355	411.406	0.0608781	243.975	-0.0365124	167.432	0.360536	1.06943	-0.518982	27.7051	1.09882	-0.535899	-0.0887345	1.32416	1.33518
MRI_C57#27	C57	C57BL/6J	2	7.34702	31	0.569809	3951.9	0.098458	1574.75	0.0245773	2377.16	0.299307	892.978	0.493925	415.088	0.0365124	477.891	0.761092	598.047	0.898476	313.262	0.334683	284.785	1.56961	1.23157	-0.142364	51.7871	1.89379	1.13342	0.987837	3.10623	2.32257
MRI_C57#16	C57	C57BL/6J	2	6.65708	31	0.569809	3448.99	-0.0737913	1454.85	-0.172881	1994.14	0.098458	879.609	0.439645	454.394	0.208355	425.215	0.578233	424.463	0.183547	227.725	-0.208355	196.738	0.697585	1.42627	0.0473125	23.2227	0.794019	-0.020192	0.216904	1.06634	1.16895
MRI_C57#26	C57	C57BL/6J	2	7.18275	34	1.01119	2213.25	-0.430727	847.705	-0.820792	1365.55	-0.351131	563.125	-0.283623	217.92	-0.52161	345.205	0.360536	362.236	-0.134251	183.174	-0.607244	179.062	0.52161	0.952858	-0.84838	9.27734	-0.109733	-1.26166	-0.458679	0.641631	0.731217
MRI_C57#22	C57	C57BL/6J	2	6.72279	31	0.569809	2739.65	-0.273702	1049.71	-0.513155	1689.94	-0.147987	1133.32	1.0138	558.506	0.636774	574.814	0.973918	567.676	0.794019	320.312	0.386631	247.363	1.0138	1.41094	0.0236496	37.8516	1.49115	0.791169	0.799083	2.15394	2.04959
MRI_C57#15	C57	C57BL/6J	2	6.65708	33	0.902159	1937.63	-0.59923	851.65	-0.786845	1085.98	-0.541395	617.07	-0.183547	287.861	-0.283623	329.209	0.283623	302.295	-0.439645	155.547	-0.82783	146.748	0.208355	1.03828	-0.6306	21.8359	0.761092	-1.07623	-0.269066	1.04573	1.12021
MRI_C57#21	C57	C57BL/6J	2	6.68994	29	0.13842	3128.61	-0.123185	1409.93	-0.197882	1718.68	-0.098458	623.008	-0.134251	346.816	-0.208355	276.191	0.0121684	536.064	0.636774	286.172	0.0852799	249.893	1.05536	1.40532	0	19.5312	0.697585	-0.212336	0.114185	1.32701	1.39966
MRI_C57#18	C57	C57BL/6J	2	6.65708	30	0.291535	4068.2	0.123185	1558.15	-0.0491694	2510.05	0.377392	1116.17	0.935531	591.66	0.761092	524.512	0.862614	601.924	0.935531	332.275	0.466613	269.648	1.29833	1.53281	0.166295	34.3652	1.42092	1.09108	0.908458	1.91405	1.74602
MRI_C57#23	C57	C57BL/6J	2	6.95277	33	0.902159	2860.03	-0.223008	1193.94	-0.403916	1666.09	-0.172881	959.033	0.607244	538.008	0.578233	421.025	0.549701	583.516	0.82783	313.76	0.360536	269.756	1.35708	2.11728	0.659719	31.0449	1.29833	0.689744	0.698526	1.88923	1.63998
MRI_C57#29	C57	C57BL/6J	2	7.34702	31	0.569809	2794.5	-0.248275	1249.42	-0.273702	1545.08	-0.273702	571.191	-0.258376	292.832	-0.258376	278.359	0.0365124	419.746	0.158851	238.848	-0.109733	180.898	0.549701	1.02334	-0.689409	16.3281	0.386631	-0.81535	-0.165327	0.828786	0.987837
MRI_C57#19	C57	C57BL/6J	2	6.65708	30	0.291535	1608.04	-0.891709	580.996	-1.4157	1027.04	-0.570074	445.674	-0.466613	214.228	-0.549701	231.445	-0.208355	278.701	-0.728971	137.187	-1.14447	141.514	0.158851	1.51074	0.142364	18.9648	0.636774	-1.36339	-0.515705	0.949153	1.02996
MRI_C57#20	C57	C57BL/6J	2	6.68994	29	0.13842	2738.94	-0.299307	1136.1	-0.457852	1602.83	-0.248275	855.391	0.360536	401.26	-0.0608781	454.131	0.666871	542.773	0.666871	290.967	0.134251	251.807	1.09882	1.20199	-0.21446	25.8691	0.862614	0.0843329	0.269066	1.70725	1.47055
MRI_C57#28	C57	C57BL/6J	2	7.34702	27	-0.13842	3466.56	-0.0491694	1559.23	-0.0245773	1907.33	0.0491694	700.185	0.0121684	369.971	-0.158851	330.215	0.309053	596.172	0.862614	356.885	0.607244	239.287	0.898476	1.6167	0.263127	21.582	0.728971	0.156366	0.348756	1.24113	1.27582
MRI_C57#17	C57	C57BL/6J	2	6.65708	31	0.569809	1879.03	-0.689997	659.766	-1.13852	1219.27	-0.403916	384.326	-0.578233	117.197	-1.29833	267.129	-0.0365124	257.764	-0.82783	141.787	-1.0138	115.977	-0.134251	1.75855	0.439392	13.9551	0.258376	-1.51186	-0.666564	0.535077	0.666564
MRI_C57#24	C57	C57BL/6J	2	7.1499	32	0.787152	3085.67	-0.147987	1462.7	-0.123185	1622.97	-0.197882	866.475	0.412993	503.34	0.386631	363.135	0.386631	500.42	0.466613	298.76	0.158851	201.66	0.728971	1.7499	0.413493	25.2734	0.82783	0.183348	0.375793	1.13129	1.22064
MRI_C57#14	C57	C57BL/6J	2	6.49281	31	0.569809	2091.87	-0.513155	969.27	-0.721522	1122.6	-0.485318	809.199	0.208355	416.475	0.0608781	392.725	0.493925	444.248	0.258376	237.383	-0.134251	206.865	0.761092	0.865108	-1.07356	29.8437	1.19264	-0.324274	0.063341	1.71939	1.54971
MRI_AJ#11	AJ	A/J	3	6.6694	27	-0.13842	4351.38	0.197882	2125.3	0.197882	2226.07	0.147987	664.294	-0.0852799	508.756	0.439645	155.537	-0.578233	263.631	-0.794019	243.294	-0.0608781	20.3375	-1.89379	1.05452	-0.602006	5.2875	-0.794019	-1.05476	-0.242903	-1.26702	-1.63998
MRI_AJ#5	AJ	A/J	3	6.43943	31	0.569809	5259.06	0.485318	2610.69	0.430727	2648.37	0.485318	825.156	0.258376	618.987	0.82783	206.169	-0.283623	415.719	0.134251	343.544	0.52161	72.175	-0.794019	1.70067	0.362496	7.14375	-0.334683	-0.106307	0.165327	-1.13782	-1.22064
MRI_AJ#3	AJ	A/J	3	6.37372	31	0.569809	4867.92	0.377392	2247.49	0.32511	2620.42	0.457852	1197.21	1.05536	766.65	1.14447	430.562	0.607244	547.387	0.728971	398.831	0.794019	148.556	0.258376	2.11491	0.6306	5.93125	-0.666871	0.650228	0.604585	-0.774301	-0.834427
MRI_AJ#8	AJ	A/J	3	6.43943	28	0.0345017	3745.06	0.0245773	1925.39	0.0737913	1819.67	0.0245773	634.987	-0.109733	463.4	0.233293	171.587	-0.52161	290	-0.493925	235.431	-0.183547	54.5687	-1.09882	1.06773	-0.546233	3.88125	-0.973918	-1.16109	-0.321971	-0.990223	-1.07399
MRI_AJ#1	AJ	A/J	3	6.37372	30	0.291535	2924.13	-0.197882	1218.39	-0.351131	1705.74	-0.123185	496.487	-0.334683	382.425	-0.134251	114.062	-0.898476	240.175	-0.898476	191.512	-0.52161	48.6625	-1.35708	0.949783	-0.882774	3.00625	-1.14447	-1.68361	-0.76471	-0.827252	-0.987837
MRI_AJ#10	AJ	A/J	3	6.6694	28	0.0345017	6229.92	0.786845	3269.62	0.891709	2960.3	0.570074	674.119	-0.0365124	526.769	0.549701	147.35	-0.607244	330.456	-0.233293	298.881	0.183547	31.575	-1.65914	1.20166	-0.238723	4.0375	-0.935531	-0.46826	0.0126601	-1.60225	-2.32257
MRI_AJ#9	AJ	A/J	3	6.6694	33	0.902159	6442	0.820792	2959.37	0.721522	3482.62	0.820792	1038.54	0.794019	731.981	1.05536	306.556	0.183547	413.144	0.0852799	352.775	0.578233	60.3687	-1.05536	1.61502	0.238723	8.15	-0.233293	0.378166	0.515705	-1.39233	-1.87636
MRI_AJ#2	AJ	A/J	3	6.37372	27	-0.13842	3918.26	0.0737913	2100.43	0.172881	1817.83	0	780.762	0.109733	557.612	0.607244	223.15	-0.233293	196.644	-1.24375	163.569	-0.794019	33.075	-1.56961	0.831267	-1.16188	4.7375	-0.862614	-1.17759	-0.375793	-1.14536	-1.27582
MRI_AJ#4	AJ	A/J	3	6.37372	28	0.0345017	5014.87	0.430727	2648.89	0.513155	2365.97	0.273702	912.644	0.549701	588.419	0.728971	324.225	0.258376	516.037	0.52161	400.037	0.82783	116	-0.109733	2.06415	0.602006	5.96875	-0.636774	0.252221	0.430727	-0.914847	-1.02996
MRI_AJ#12	AJ	A/J	3	6.6694	30	0.291535	5796	0.570074	2713.1	0.541395	3082.9	0.659143	1028.18	0.761092	727.487	1.0138	300.694	0.158851	498.756	0.439645	434.8	1.0138	63.9562	-0.898476	1.90434	0.518982	3.625	-1.0138	0.364535	0.486994	-1.58517	-2.04959
MRI_AJ#6	AJ	A/J	3	6.43943	27	-0.13842	2942.36	-0.172881	1518.69	-0.098458	1423.67	-0.32511	614.587	-0.208355	441.169	0.158851	173.419	-0.493925	300.031	-0.466613	219.525	-0.283623	80.5062	-0.636774	1.20012	-0.287689	1.88125	-1.29833	-1.33012	-0.486994	-0.784354	-0.908458
MRI_AJ#7	AJ	A/J	3	6.43943	30	0.291535	5686.77	0.541395	2883.3	0.689997	2803.47	0.513155	774.406	0.0608781	518.475	0.52161	255.931	-0.0852799	282.231	-0.607244	236.787	-0.158851	45.4437	-1.49115	1.18024	-0.312426	7.4875	-0.283623	-0.482635	-0.0126601	-1.19226	-1.39966
MRI_NOD#1	NOD	NOD/ShiLtJ	4	5.8152	30	0.291535	3823.72	0.0491694	1559.83	0	2263.9	0.197882	460.275	-0.412993	198.394	-0.607244	261.881	-0.0608781	315.331	-0.360536	198.975	-0.386631	116.356	-0.0852799	1.6991	0.337355	3.225	-1.05536	-1.14995	-0.295415	-0.378528	-0.348756
MRI_NOD#10	NOD	NOD/ShiLtJ	4	6.43943	32	0.787152	4640.56	0.299307	2257.39	0.351131	2383.17	0.32511	1076.47	0.82783	488.594	0.309053	587.881	1.0138	550.098	0.761092	325.644	0.412993	224.453	0.794019	1.61294	0.21446	18.1543	0.549701	0.68631	0.666564	0.706592	0.834427
MRI_NOD#13	NOD	NOD/ShiLtJ	4	7.29363	22	-0.556335																			0.942415	-0.918245
MRI_NOD#2	NOD	NOD/ShiLtJ	4	5.8152	34	1.01119	5193.17	0.457852	2176.07	0.248275	3017.1	0.628904	806.8	0.183547	435.837	0.109733	370.962	0.412993	284.787	-0.549701	175.012	-0.728971	109.775	-0.208355	2.12102	0.689409	6.375	-0.52161	-0.316121	0.0887345	-0.653824	-0.76471
MRI_NOD#4	NOD	NOD/ShiLtJ	4	5.91376	17	-1.35848																			0.343378	-1.90636
MRI_NOD#8	NOD	NOD/ShiLtJ	4	5.97947	25	-0.327725																			0.809354	-1.20965
MRI_NOD#9	NOD	NOD/ShiLtJ	4	6.89938	31	0.569809	4493.8	0.248275	2050.3	0.123185	2443.5	0.351131	607.787	-0.233293	417.162	0.0852799	190.625	-0.412993	245.794	-0.862614	198.844	-0.412993	46.95	-1.42092	1.07143	-0.49211	1.69375	-1.42092	-1.19554	-0.403108	-1.17621	-1.33518
MRI_NOD#6	NOD	NOD/ShiLtJ	4	5.97947	31	0.569809	1897.54	-0.659143	760.325	-0.928899	1137.22	-0.430727	230.887	-1.19264	110.812	-1.42092	120.075	-0.794019	223.312	-1.0138	125.962	-1.19264	97.35	-0.439645	1.27426	-0.0710019	2.0875	-1.19264	-2.16222	-1.12021	-0.173768	0.0126601
MRI_NOD#5	NOD	NOD/ShiLtJ	4	5.91376	32	0.787152	803	-1.88951	353.8	-1.75986	449.2	-1.65443	107.306	-2.06593	79.5937	-2.06593	27.7125	-1.89379	109.606	-1.76437	57.5437	-2.06593	52.0625	-1.19264	0.44043	-1.67294	0.8875	-1.65914	-3.0379	-1.87636	-0.283274	-0.191052
MRI_NOD#3	NOD	NOD/ShiLtJ	4	5.8152	23	-0.490397																			0.709091	-1.50597
MRI_NOD#11	NOD	NOD/ShiLtJ	4	6.43943	30	0.291535	3658.95	0	1895.94	0.0491694	1763.01	-0.0737913	1269.47	1.14447	624.473	0.935531	645	1.24375	636.201	1.0138	380.342	0.761092	255.859	1.14447	2.32892	0.750705	5.05759	-0.82783	0.790497	0.76471	0.172205	0.321971
MRI_NOD#14	NOD	NOD/ShiLtJ	4	7.29363	32	0.787152	4418.45	0.223008	2186.1	0.273702	2232.35	0.172881	1121.33	0.973918	605.293	0.794019	516.035	0.794019	482.676	0.386631	290.137	0.109733	192.539	0.636774	1.59644	0.190322	14.1211	0.283623	0.444103	0.544847	0.230205	0.430727
MRI_NOD#7	NOD	NOD/ShiLtJ	4	5.97947	34	1.01119	2416.2	-0.377392	1327.42	-0.223008	1088.78	-0.513155	217.762	-1.29833	162.8	-0.935531	54.9625	-1.56961	212.931	-1.09882	78.1312	-1.76437	134.8	0.0608781			1.6	-1.49115
MRI_NOD#12	NOD	NOD/ShiLtJ	4	7.29363	21	-0.652992																			0.959885	-0.782429
MRI_NZO#8	NZO	NZO/HlLtJ	5	5.97947	56	1.59778	12736.2	1.29281	5515.77	1.48609	7220.46	1.23808	1877.87	1.35708	1059.78	1.42092	818.094	1.42092	1090.43	1.42092	932.606	1.89379	157.825	0.309053	5.36255	1.77759	30.375	1.24375	5.56579	1.54971	-1.25648	-1.54971
MRI_NZO#9	NZO	NZO/HlLtJ	5	5.97947	47	1.27634	12740.4	1.3517	5068.92	1.3517	7671.45	1.29281	1238.07	1.09882	515.219	0.466613	722.856	1.29833	735.944	1.14447	493.831	1.14447	242.112	0.935531	4.27039	1.43621	40.0625	1.65914	4.09716	1.33518	0.643304	0.76471
MRI_NZO#10	NZO	NZO/HlLtJ	5	5.97947	58	1.79037	15305	1.75986	6052.5	1.88951	9252.5	1.88951	2026.14	1.42092	1392.57	1.89379	633.569	1.14447	316.475	-0.334683	242.419	-0.0852799	74.0562	-0.697585	3.70606	1.3145	60.15	2.33742	4.98831	1.47055	-0.315951	-0.242903
MRI_NZO#12	NZO	NZO/HlLtJ	5	5.97947	54	1.388	14565.9	1.65443	5718.37	1.65443	8847.55	1.65443	988.644	0.697585	752.669	1.09882	235.975	-0.183547	1336.14	1.89379	670.156	1.24375	665.987	2.06593	2.77673	0.954911	19.35	0.666871	4.95187	1.39966	2.10295	1.87636
MRI_NZO#11	NZO	NZO/HlLtJ	5	5.97947	55	1.48473	13603.1	1.48609	5804.15	1.75986	7798.92	1.4157	2730.43	1.76437	1255.33	1.76437	1475.1	1.65914	1235.81	1.65914	968.1	2.06593	267.712	1.24375	2.51001	0.814961	26.4125	0.973918	6.34892	1.74602	-0.745437	-0.799083
MRI_NZO#7	NZO	NZO/HlLtJ	5	5.91376	57	1.68627	12687.7	1.23808	4986.09	1.29281	7701.64	1.3517	2391.61	1.49115	1143.68	1.56961	1247.92	1.49115	1111.95	1.49115	829.875	1.42092	282.075	1.49115	7.56373	2.34813	39.875	1.56961	7.06221	1.87636	-0.0159414	0.165327
MRI_NZO#3	NZO	NZO/HlLtJ	5	5.74949	45	1.22604	8503.83	1.04913	3198.27	0.820792	5305.56	1.18683	1081.19	0.862614	492.287	0.334683	588.9	1.05536	531.75	0.607244	362.987	0.636774	168.762	0.386631	5.38782	1.90636	18.1187	0.52161	2.30353	1.12021	-0.435487	-0.486994
MRI_NZO#1	NZO	NZO/HlLtJ	5	5.68378	63	2.35851	16200	2.06192	5662.8	1.56473	10537.2	2.33377	3174.08	2.06593	1420.52	2.06593	1753.55	2.06593	1802.58	2.33742	888.151	1.65914	914.427	2.33742			31.2559	1.35708
MRI_NZO#6	NZO	NZO/HlLtJ	5	5.91376	55	1.48473	15469.1	1.88951	6379.94	2.06192	9089.19	1.75986	2420.72	1.56961	1045.27	1.35708	1375.44	1.56961	1084.37	1.35708	851.8	1.49115	232.569	0.862614	4.96949	1.67294	45.1312	1.76437	7.06756	2.04959	-0.20506	-0.0126601
MRI_NZO#2	NZO	NZO/HlLtJ	5	5.68378	61	2.08912	16996.5	2.33377	6716.13	2.33377	10280.4	2.06192	3625.02	2.33742	1695.1	2.33742	1929.92	2.33742	1622.46	2.06593	1192.78	2.33742	429.678	1.89379			55.9559	2.06593
MRI_NZO#4	NZO	NZO/HlLtJ	5	5.74949	59	1.91851	13650	1.56473	5210.67	1.4157	8439.37	1.56473	2797.26	1.89379	1077.61	1.49115	1719.65	1.89379	1247.88	1.76437	909.856	1.76437	338.019	1.76437	7.5525	2.07771	26.7437	1.0138	7.72836	2.32257	-0.402418	-0.375793
MRI_NZO#5	NZO	NZO/HlLtJ	5	5.91376	53	1.3301	13135.8	1.4157	4857.26	1.23808	8278.58	1.48609	2673.52	1.65914	999.047	1.29833	1674.48	1.76437	1173.14	1.56961	853.149	1.56961	319.988	1.65914	4.2732	1.50597	17.655	0.493925	6.26886	1.63998	-0.559485	-0.666564
MRI_CAST#5	CAST	CAST/EiJ	6	6.37372	19	-0.992198	2015.2	-0.570074	1223.4	-0.299307	791.797	-0.786845	287.93	-0.862614	177.598	-0.697585	110.332	-0.973918	415.264	0.109733	268.955	0.0365124	146.309	0.183547	1.6233	0.287689	17.2559	0.466613	-1.17346	-0.348756	0.728933	0.870846
MRI_CAST#10	CAST	CAST/EiJ	6	7.29363	21	-0.652992	1664.73	-0.753782	1083.36	-0.485318	581.367	-1.23808	246.103	-1.0138	153.779	-1.05536	92.3242	-1.24375	284.883	-0.52161	178.77	-0.697585	106.113	-0.283623	1.26902	-0.118514	13.584	0.233293	-1.76391	-0.834427	0.401787	0.544847
MRI_CAST#11	CAST	CAST/EiJ	6	7.35934	20	-0.802925	1433.36	-1.04913	744.609	-1.04913	688.75	-0.947985	321.934	-0.697585	184.297	-0.666871	137.637	-0.728971	229.502	-0.973918	142.07	-0.935531	87.4316	-0.578233	0.897144	-0.954911	12.959	0.183547	-1.97273	-0.987837	0.326038	0.486994
MRI_CAST#8	CAST	CAST/EiJ	6	6.6694	19	-0.992198	2139.09	-0.457852	1221.6	-0.32511	917.484	-0.659143	427.734	-0.52161	249.189	-0.412993	178.545	-0.466613	395.254	-0.0608781	247.559	-0.0121684	147.695	0.233293	1.70678	0.387869	18.7891	0.607244	-0.961811	-0.191052	0.757516	0.908458
MRI_CAST#6	CAST	CAST/EiJ	6	6.37372	25	-0.327725	1432.07	-1.09274	1005.59	-0.628904	426.484	-1.88951	302.764	-0.82783	175.029	-0.761092	127.734	-0.761092	280.049	-0.666871	181.846	-0.636774	98.2031	-0.386631	1.27295	-0.0947312	15.4199	0.360536	-1.71758	-0.799083	0.45242	0.604585
MRI_CAST#12	CAST	CAST/EiJ	6	7.35934	14	-2.20402	1236.87	-1.29281	800.039	-0.855712	436.836	-1.75986	246.797	-0.973918	132.91	-1.09882	113.887	-0.935531	217.266	-1.05536	143.662	-0.898476	73.6035	-0.728971	0.878938	-1.0324	6.30859	-0.578233	-2.29401	-1.22064	-0.0652036	0.114185
MRI_CAST#9	CAST	CAST/EiJ	6	7.29363	18	-1.20201	1586.95	-0.928899	997.539	-0.659143	589.414	-1.18683	275.049	-0.898476	173.564	-0.794019	101.484	-1.09882	306.27	-0.386631	209.512	-0.309053	96.7578	-0.466613	1.14155	-0.362496	9.0918	-0.158851	-1.85396	-0.908458	0.0978798	0.269066
MRI_CAST#2	CAST	CAST/EiJ	6	6.37372	21	-0.652992	882.75	-1.75986	305.775	-1.88951	576.975	-1.29281	216.644	-1.35708	117.437	-1.24375	99.2062	-1.14447	52.2937	-2.33742	33.0687	-2.33742	19.225	-2.06593	0.211552	-2.34813	2.075	-1.24375	-3.0696	-2.04959	-0.446934	-0.544847
MRI_CAST#7	CAST	CAST/EiJ	6	6.6694	16	-1.55786	2060.51	-0.541395	1175.43	-0.430727	885.078	-0.721522	235.937	-1.09882	159.853	-0.973918	76.084	-1.49115	269.346	-0.761092	189.756	-0.549701	79.5898	-0.666871	1.21206	-0.190322	11.1621	0.0121684	-1.82488	-0.870846	0.0423659	0.242903
MRI_CAST#14	CAST	CAST/EiJ	6	7.35934	17	-1.35848	1567.15	-1.00744	957.891	-0.753782	609.258	-1.04913	356.211	-0.666871	212.471	-0.578233	143.74	-0.636774	283.525	-0.578233	180.039	-0.666871	103.486	-0.334683	1.14699	-0.337355	26.3086	0.935531	-1.39624	-0.544847	1.03161	1.07399
MRI_CAST#1	CAST	CAST/EiJ	6	6.37372	14	-2.20402	742.675	-2.06192	205.625	-2.33377	537.05	-1.4157	117.325	-1.89379	104.187	-1.65914	13.1375	-2.33742	74.2812	-2.06593	60.1812	-1.89379	14.1	-2.33742	0.32076	-2.07771	3.09375	-1.09882	-3.13175	-2.32257	-0.420057	-0.403108
MRI_CAST#13	CAST	CAST/EiJ	6	7.35934	19	-0.992198	1178.91	-1.4157	756.992	-1.00744	421.914	-2.06192	244.277	-1.05536	159.502	-1.0138	84.7754	-1.29833	235.4	-0.935531	148.73	-0.862614	86.6699	-0.607244	1.0379	-0.659719	10.7324	-0.0121684	-2.11697	-1.02996	0.228316	0.403108
MRI_CAST#3	CAST	CAST/EiJ	6	6.37372	18	-1.20201	1338.44	-1.13852	649.687	-1.18683	688.75	-0.947985	259.092	-0.935531	176.328	-0.728971	82.7637	-1.35708	357.158	-0.158851	219.941	-0.258376	137.217	0.0852799	1.34746	-0.0473125	14.4043	0.309053	-1.62865	-0.731217	0.691887	0.799083
MRI_CAST#4	CAST	CAST/EiJ	6	6.37372	16	-1.55786	1095.55	-1.48609	611.875	-1.29281	483.672	-1.48609	140.107	-1.76437	121.396	-1.14447	18.7109	-2.06593	169.404	-1.42092	96.9531	-1.35708	72.4512	-0.761092	0.723818	-1.37281	6.32812	-0.549701	-2.59	-1.33518	0.00821733	0.191052
MRI_PWK#6	PWK	PWK/PhJ	7	6.89938	25	-0.327725	5921.1	0.659143	2561.62	0.403916	3359.47	0.786845	777.919	0.0852799	403.356	-0.0365124	374.562	0.466613	368.737	-0.109733	259.512	0.0121684	109.225	-0.233293	3.84034	1.37281	8.58125	-0.183547	0.446128	0.57446	-0.807316	-0.947401
MRI_PWK#5	PWK	PWK/PhJ	7	6.89938	21	-0.652992	4292.9	0.172881	2093.97	0.147987	2198.92	0.123185	500.525	-0.309053	283.156	-0.309053	217.369	-0.258376	497.312	0.412993	312.812	0.309053	184.5	0.607244	4.86084	1.58394	4.53125	-0.898476	0.266301	0.458679	-0.325259	-0.269066
MRI_PWK#9	PWK	PWK/PhJ	7	7.06366	25	-0.327725	7295.75	0.855712	3366.52	0.967422	3929.22	0.891709	672.006	-0.0608781	351.575	-0.183547	320.431	0.233293	662.756	1.05536	416.131	0.973918	246.625	0.973918	2.46338	0.782429	7.1375	-0.386631	0.959097	0.834427	-0.0756094	0.0887345
MRI_PWK#10	PWK	PWK/PhJ	7	7.06366	27	-0.13842	7460.38	0.928899	3360.1	0.928899	4100.27	0.967422	881.256	0.466613	409.494	-0.0121684	471.762	0.728971	544.031	0.697585	347.331	0.549701	196.7	0.666871	2.65384	0.882774	11.625	0.121983	1.10948	0.947401	-0.222175	-0.0379883
MRI_PWK#4	PWK	PWK/PhJ	7	6.89938	28	0.0345017	8046.97	1.00744	3604.45	1.00744	4442.52	1.04913	950.962	0.578233	411.55	0.0121684	539.412	0.898476	734.637	1.09882	478.587	1.09882	256.05	1.19264	3.52783	1.26034	11.3063	0.0608781	1.95222	1.07399	-0.0482215	0.13971
MRI_PWK#11	PWK	PWK/PhJ	7	7.29363	24	-0.439153	5796.65	0.59923	2788.32	0.628904	3008.32	0.59923	382.225	-0.607244	264.337	-0.334683	117.887	-0.82783	394.3	-0.0852799	299.881	0.208355	94.4187	-0.493925	2.99484	1.11663	1.85	-1.35708	-0.366681	0.0379883	-1.12429	-1.16895
MRI_PWK#3	PWK	PWK/PhJ	7	6.83368	25	-0.327725	6151.25	0.753782	2994.35	0.753782	3156.9	0.689997	852.056	0.334683	398.531	-0.0852799	453.525	0.636774	404.437	0.0365124	285.531	0.0608781	118.906	-0.0365124	2.83936	1.0324	18.4812	0.578233	0.666994	0.63527	-0.225795	-0.114185
MRI_PWK#1	PWK	PWK/PhJ	7	6.83368	25	-0.327725	5897.45	0.628904	2634.6	0.485318	3262.85	0.721522	846.262	0.283623	385.944	-0.109733	460.319	0.697585	478.106	0.334683	305.675	0.233293	172.431	0.439645	3.125	1.16188	11.625	0.121983	0.694353	0.731217	-0.171552	0.0379883
MRI_PWK#2	PWK	PWK/PhJ	7	6.83368	28	0.0345017	8649.02	1.13852	4017.6	1.04913	4631.42	1.09274	1102.66	0.898476	465.675	0.258376	636.987	1.19264	625.625	0.973918	442.194	1.05536	183.431	0.578233	2.92725	1.07356	15.0062	0.334683	1.92618	1.02996	-0.431164	-0.458679
MRI_PWK#7	PWK	PWK/PhJ	7	6.89938	23	-0.490397	6099.1	0.721522	2831.57	0.659143	3267.52	0.753782	809.5	0.233293	437.706	0.134251	371.794	0.439645	317.225	-0.309053	195.162	-0.466613	122.062	0.0121684	2.29737	0.719719	5.85625	-0.697585	0.00727298	0.242903	-0.775419	-0.870846
MRI_PWK#8	PWK	PWK/PhJ	7	7.06366	28	0.0345017	7298.27	0.891709	3150.17	0.786845	4148.1	1.00744	965.537	0.666871	443.644	0.183547	521.894	0.82783	476.875	0.309053	311.206	0.283623	165.669	0.334683	2.51465	0.84838	16.3312	0.412993	1.07959	0.870846	-0.149185	0.063341
MRI_PWK#12	PWK	PWK/PhJ	7	7.29363	23	-0.490397	3352.4	-0.098458	1542.3	-0.0737913	1810.1	-0.0245773	475.331	-0.386631	239.35	-0.439645	235.981	-0.158851	329.525	-0.283623	209.381	-0.334683	120.144	-0.0121684	3.12857	1.20965	7.1125	-0.412993	-0.738061	-0.13971	-0.262675	-0.13971
MRI_WSB#8	WSB	WSB/EiJ	8	6.40657	15	-1.85065	1621.25	-0.855712	1025.24	-0.570074	596.017	-1.13852	202.314	-1.49115	107.832	-1.49115	94.4824	-1.19264	197.187	-1.19264	90.7129	-1.49115	106.475	-0.258376	0.887344	-0.992908	7.01172	-0.439645	-2.24726	-1.16895	0.188467	0.348756
MRI_WSB#12	WSB	WSB/EiJ	8	6.43943	20	-0.802925	2215.55	-0.403916	1290.74	-0.248275	924.805	-0.628904	457.646	-0.439645	251.865	-0.386631	205.781	-0.309053	305.527	-0.412993	195.352	-0.439645	110.176	-0.183547	1.22211	-0.166295	10.4395	-0.0365124	-1.43385	-0.57446	0.114697	0.295415
MRI_WSB#11	WSB	WSB/EiJ	8	6.43943	18	-1.20201	1915.27	-0.628904	1046.05	-0.541395	869.219	-0.753782	309.883	-0.794019	168.291	-0.862614	141.592	-0.666871	329.629	-0.258376	191.953	-0.493925	137.676	0.109733	1.46835	0.0947312	9.24805	-0.134251	-1.57855	-0.698526	0.344748	0.515705
MRI_WSB#2	WSB	WSB/EiJ	8	5.4538	19	-0.992198	1250.85	-1.23808	589.8	-1.3517	661.05	-1.00744	320.706	-0.728971	164.206	-0.898476	156.5	-0.549701	280.15	-0.636774	187.856	-0.578233	92.2937	-0.52161	1.46442	0.0710019	6.6125	-0.493925	-1.92581	-0.947401	0.00872411	0.216904
MRI_WSB#13	WSB	WSB/EiJ	8	7.16222	19	-0.992198	1662.46	-0.786845	757.187	-0.967422	905.273	-0.689997	492.021	-0.360536	222.705	-0.466613	269.316	-0.0121684	279.297	-0.697585	140.693	-1.05536	138.603	0.134251	1.38379	-0.0236496	11.6406	0.158851	-1.48949	-0.604585	0.524377	0.63527
MRI_WSB#6	WSB	WSB/EiJ	8	5.51951	20	-0.802925	1273.25	-1.18683	580.325	-1.48609	692.925	-0.891709	145.181	-1.65914	106.894	-1.56961	38.2875	-1.65914	106.587	-1.89379	85.7375	-1.56961	20.85	-1.76437	0.431195	-1.77759	0.3	-2.06593	-2.94354	-1.74602	-0.631862	-0.698526
MRI_WSB#5	WSB	WSB/EiJ	8	5.51951	21	-0.652992	642	-2.33377	274.25	-2.06192	367.75	-2.33377	161.456	-1.56961	82.2562	-1.89379	79.2	-1.42092	144.781	-1.56961	81.825	-1.65914	62.9562	-0.973918	0.737068	-1.3145	0.8625	-1.76437	-2.85788	-1.63998	-0.225071	-0.0887345
MRI_WSB#4	WSB	WSB/EiJ	8	5.51951	19	-0.992198	1048.97	-1.56473	498.625	-1.56473	550.35	-1.3517	206.112	-1.42092	96.7875	-1.76437	109.325	-1.0138	161.919	-1.49115	98.1687	-1.29833	63.75	-0.935531	0.721274	-1.43621	0.69375	-1.89379	-2.68816	-1.47055	-0.307503	-0.216904
MRI_WSB#15	WSB	WSB/EiJ	8	7.19507	15	-1.85065	1726.68	-0.721522	995.351	-0.689997	731.328	-0.855712	311.143	-0.761092	173.232	-0.82783	137.91	-0.697585	355.947	-0.183547	202.314	-0.360536	153.633	0.283623	1.76356	0.465589	8.51562	-0.208355	-1.49107	-0.63527	0.405315	0.57446
MRI_WSB#14	WSB	WSB/EiJ	8	7.16222	16	-1.55786	2128.44	-0.485318	1005.7	-0.59923	1122.73	-0.457852	376.65	-0.636774	184.658	-0.636774	191.992	-0.386631	349.805	-0.208355	172.158	-0.761092	177.646	0.493925	1.78082	0.49211	13.0859	0.208355	-1.21621	-0.430727	0.781987	0.947401
MRI_WSB#1	WSB	WSB/EiJ	8	5.4538	20	-0.802925	1568.51	-0.967422	788.457	-0.891709	780.05	-0.820792	433.35	-0.493925	253.956	-0.360536	179.394	-0.439645	189.087	-1.35708	138.125	-1.09882	50.9625	-1.24375	0.790729	-1.26034	5.625	-0.728971	-2.12137	-1.07399	-0.368151	-0.321971
MRI_WSB#9	WSB	WSB/EiJ	8	6.40657	18	-1.20201	1223.95	-1.3517	625.273	-1.23808	598.672	-1.09274	222.217	-1.24375	118.506	-1.19264	103.711	-1.05536	202.881	-1.14447	105.488	-1.24375	97.3926	-0.412993	0.986739	-0.750705	7.2168	-0.309053	-2.29432	-1.27582	0.192507	0.375793
MRI_WSB#7	WSB	WSB/EiJ	8	5.68378	22	-0.556335	939.55	-1.65443	460.55	-1.65443	479	-1.56473	233.62	-1.14447	116.687	-1.35708	116.932	-0.862614	195.769	-1.29833	141.994	-0.973918	53.775	-1.14447	0.854264	-1.11663	0.1875	-2.33742	-2.6012	-1.39966	-0.439786	-0.515705
MRI_WSB#3	WSB	WSB/EiJ	8	5.51951	20	-0.802925	1628.47	-0.820792	688.85	-1.09274	939.625	-0.59923	99.5	-2.33742	61.8312	-2.33742	37.6687	-1.76437	140.862	-1.65914	91.6312	-1.42092	49.2312	-1.29833	0.633881	-1.58394	0.9375	-1.56961	-2.76825	-1.54971	-0.428086	-0.430727
MRI_WSB#10	WSB	WSB/EiJ	8	6.40657	16	-1.55786	2731.6	-0.32511	1461.02	-0.147987	1270.59	-0.377392	421.895	-0.549701	221.357	-0.493925	200.537	-0.360536	397.393	-0.0121684	221.123	-0.233293	176.27	0.466613	1.91471	0.546233	7.13867	-0.360536	-1.032	-0.216904	0.292421	0.458679

## Sheet: Variables
Variable	Description
mouseid	Animal ID
group	Mouse Strain (Short Name)
groupdesc	Mouse Strain (Descriptive)
groupn	Mouse Strain (Numeric)
agemons	Age (months)
weightg	Weight (grams)
invn_weightg	Normalized Weight (grams)
abdomenfat	Total Abdominal Fat Volume (mm3)
invn_abdomenfat	Normalized Total Abdominal Fat Volume
abdomensubfat	Subcutaneous Abdominal Fat Volume (mm3)
invn_abdomensubfat	Normalized Subcutaneous Abdominal Fat Volume
abdomenvisfat	Visceral Abdominal Fat Volume (mm3)
invn_abdomenvisfat	Normalized Visceral Abdominal Fat Volume
thoraxfat	Total Thoracic Fat Volume (mm3)
invn_thoraxfat	Normalized Total Thoracic Fat Volume
thoraxsubfat	Subcutaneous Thoracic Fat Volume (mm3)
invn_thoraxsubfat	Normalized Subcutaneous Thoracic Fat Volume
thoraxvisfat	Intrathoracic Fat Volume (mm3)
invn_thoraxvisfat	Normalized Intrathoracic Fat Volume
neckfat	Total Neck Fat Volume (mm3)
invn_neckfat	Normalized Total Neck Fat Volume
necksubfat	Subcutaneous Neck Fat Volume (mm3)
invn_necksubfat	Normalized Subcutaneous Neck Fat Volume
neckvisfat	Intra-Neck Fat Volume (mm3)
invn_neckvisfat	Normalized Intra-Neck Fat Volume
tonguefat	Pericardial Fat Volume (mm3)
invn_tonguefat	Normalized Pericardial Fat Volume
pericardialfat	Tongue Fat Volume (mm3)
invn_pericardialfat	Normalized Tongue Fat Volume
pc1	PC1 of Fat Volume Measures
invn_pc1	Normalized PC1 of Fat Volume Measures
pc2	PC2 of Fat Volume Measures
invn_pc2	Normalized PC2 of Fat Volume Measures
